# Supplementary material
Source: PubMed Central journal article supplement (PMC1959458)
Supplement: pnas_0701547104_1.pdf [file pnas_0701547104_1.pdf]

## Signal agonists

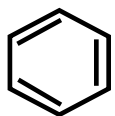

benzene

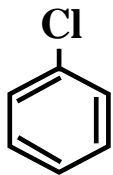

chlorobenzene

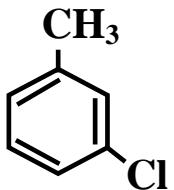

*m*-chlorotoluene

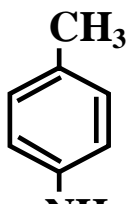

*p*-toluidine

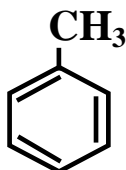

toluene

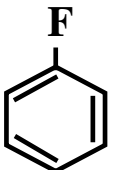

fluorobenzene

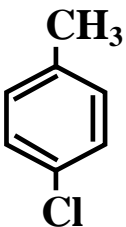

*p*-chlorotoluene

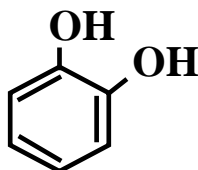

catechol

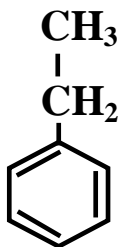

ethylbenzene

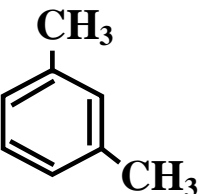

*m*-xylene

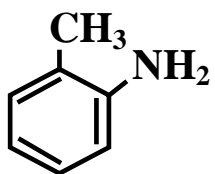

*o*-toluidine

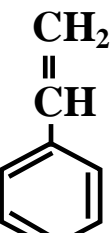

styrene

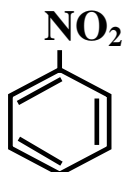

nitrobenzene

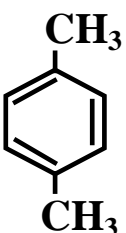

*p*-xylene

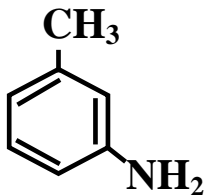

*m*-toluidine

## Signal antagonists

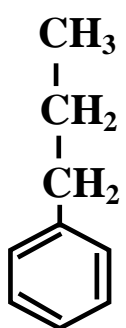

propylbenzene

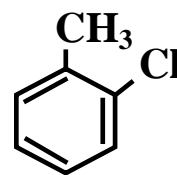

*o*-chlorotoluene

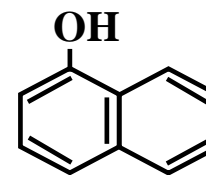

1-naphthol

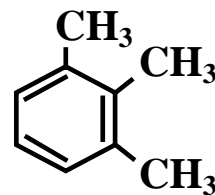

1,2,3-trimethylbenzene

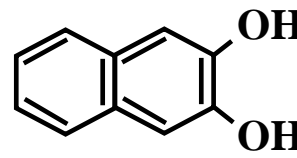

2,3-dihydroxynaphthalene

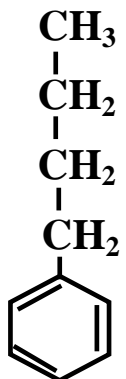

butylbenzene

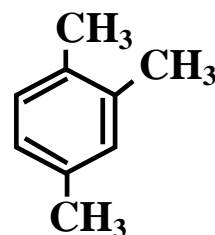

1,2,4-trimethylbenzene

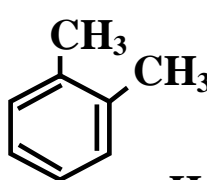

*o*-xylene

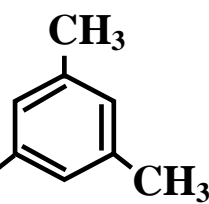

1,3,5-trimethylbenzene
