# Supplementary material
Source: PubMed Central journal article supplement (PMC1959458)

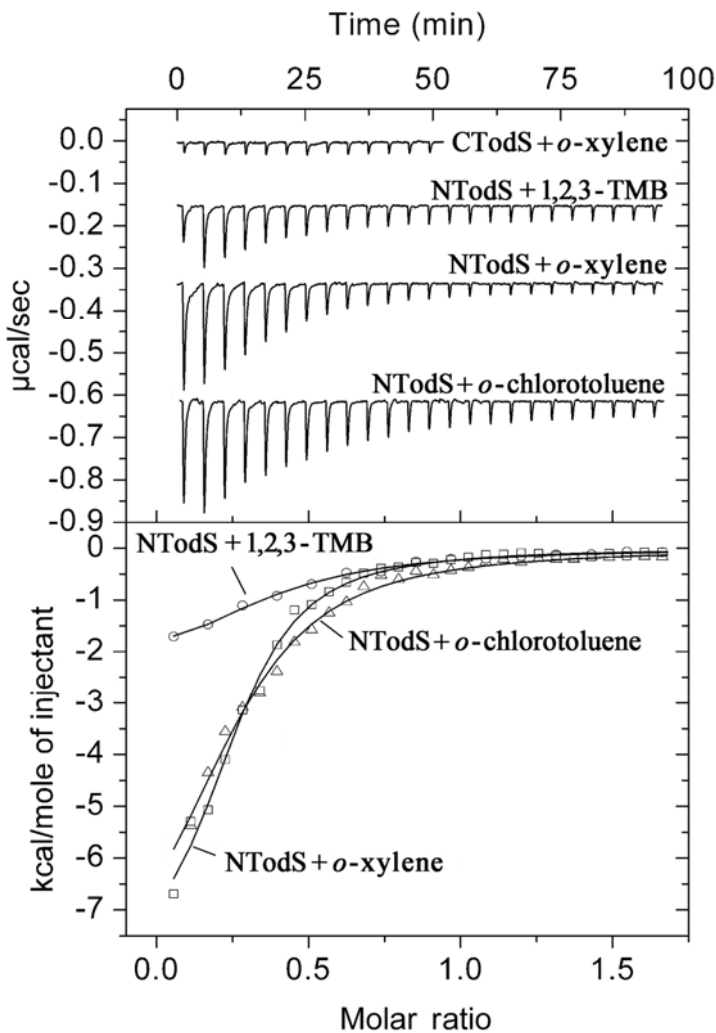

Supplement: pnas_0701547104_2.pdf [file pnas_0701547104_2.pdf]

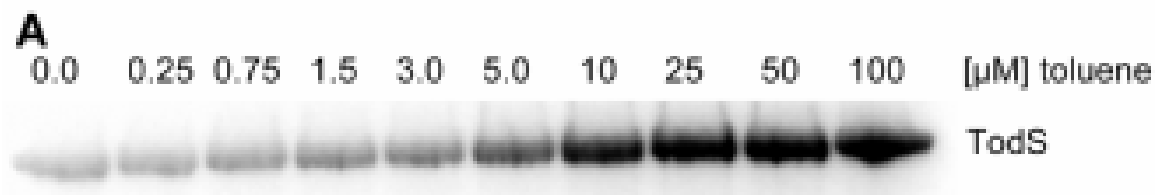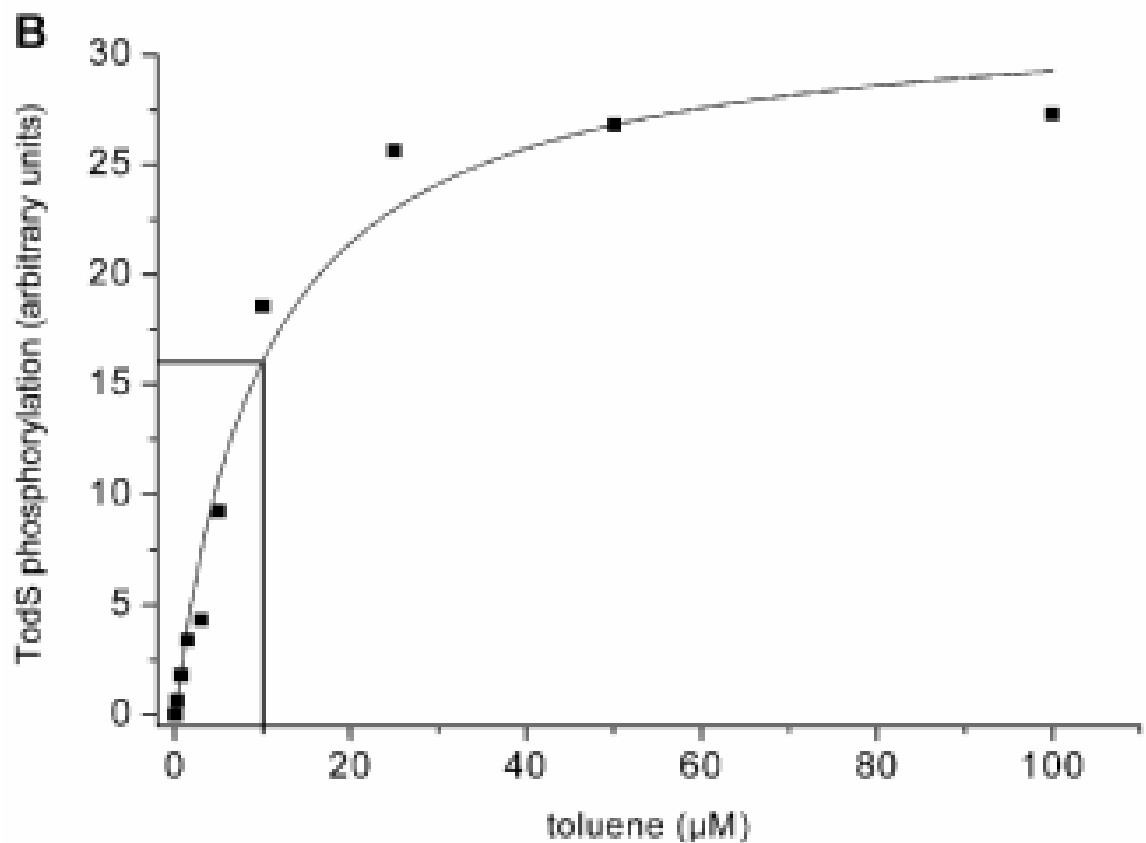

Supplement: pnas_0701547104_3.pdf [file pnas_0701547104_3.pdf]
